# Supplementary material
Source: ML conference proceedings conference paper supplement (https://openreview.net/forum?id=ilhWL2WPvS)

L=100

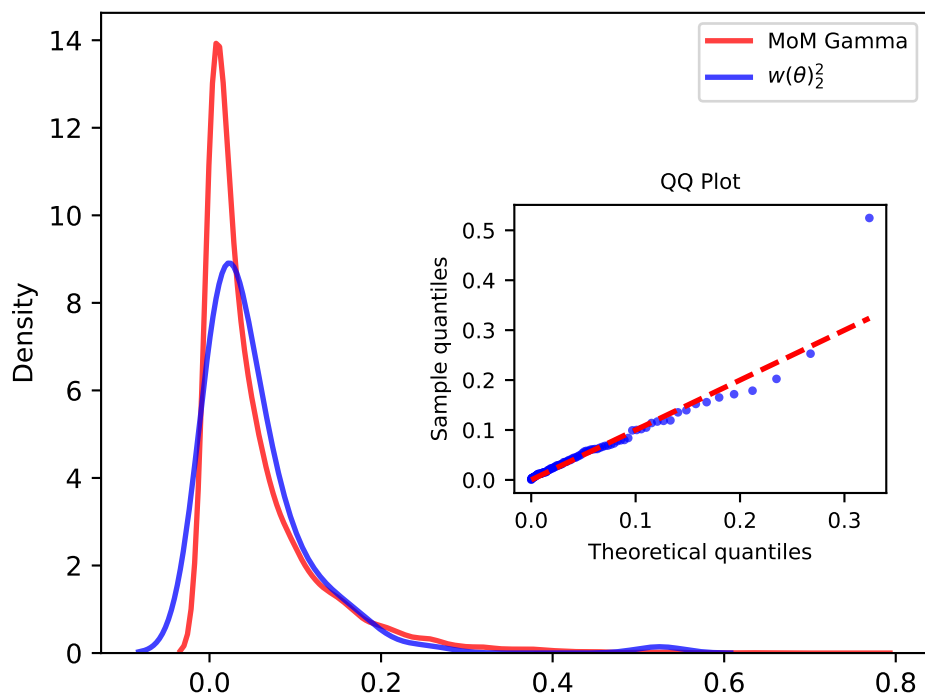

L=500

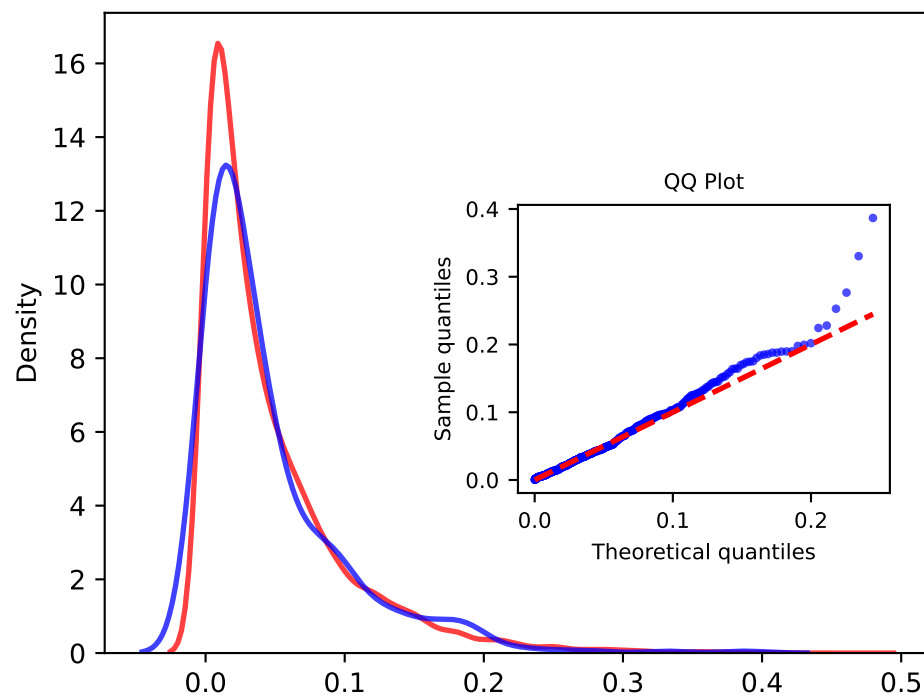

L=1000

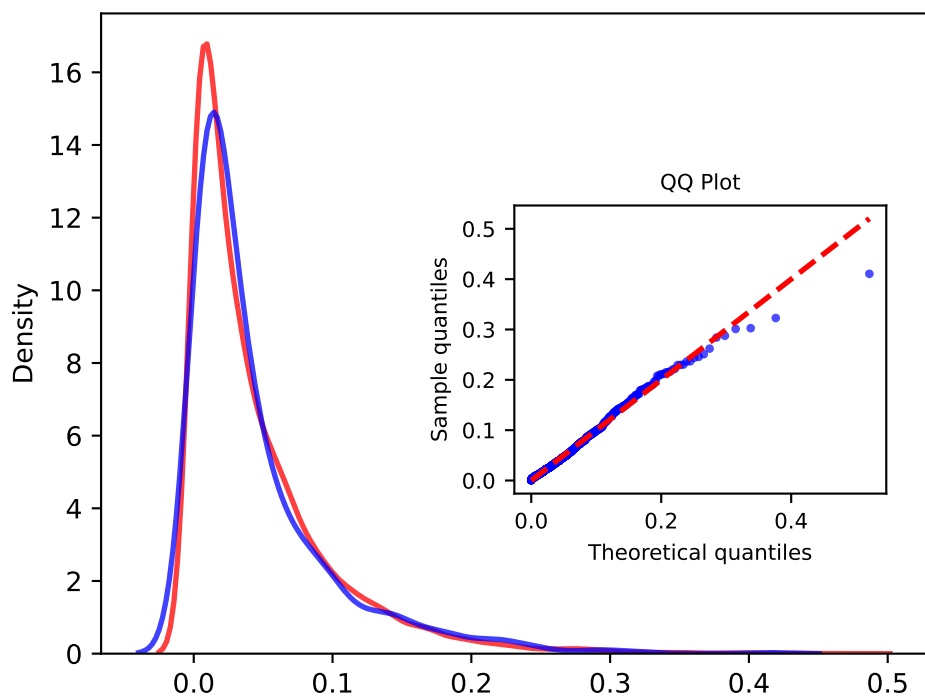

L=5000

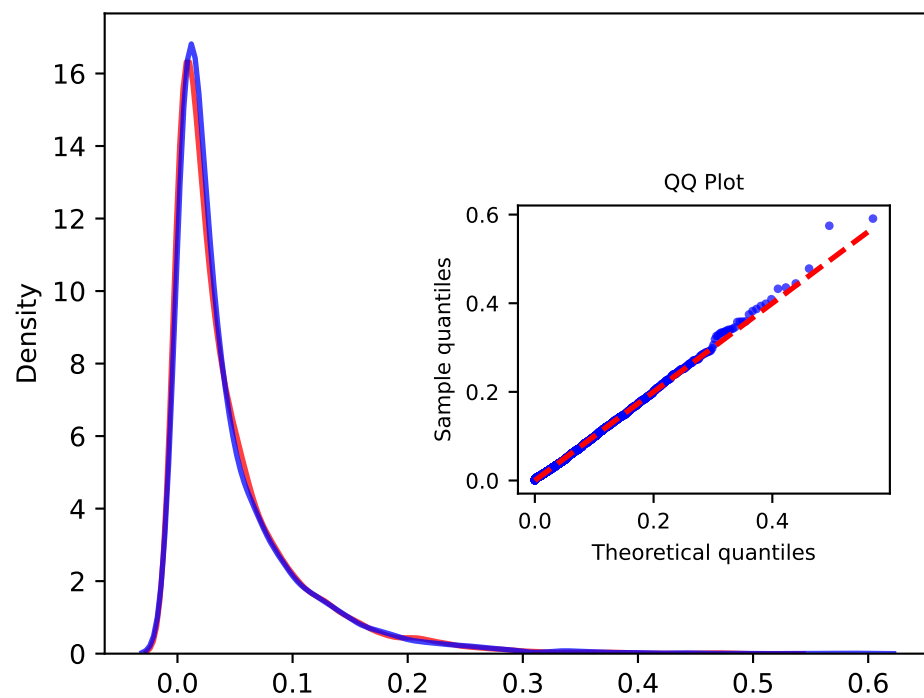

Supplement: supplementary_material [file GoF_Gamma_MNIST.pdf › CODE_SWCPD/Appendix/GoF_Gamma_MNIST.pdf]

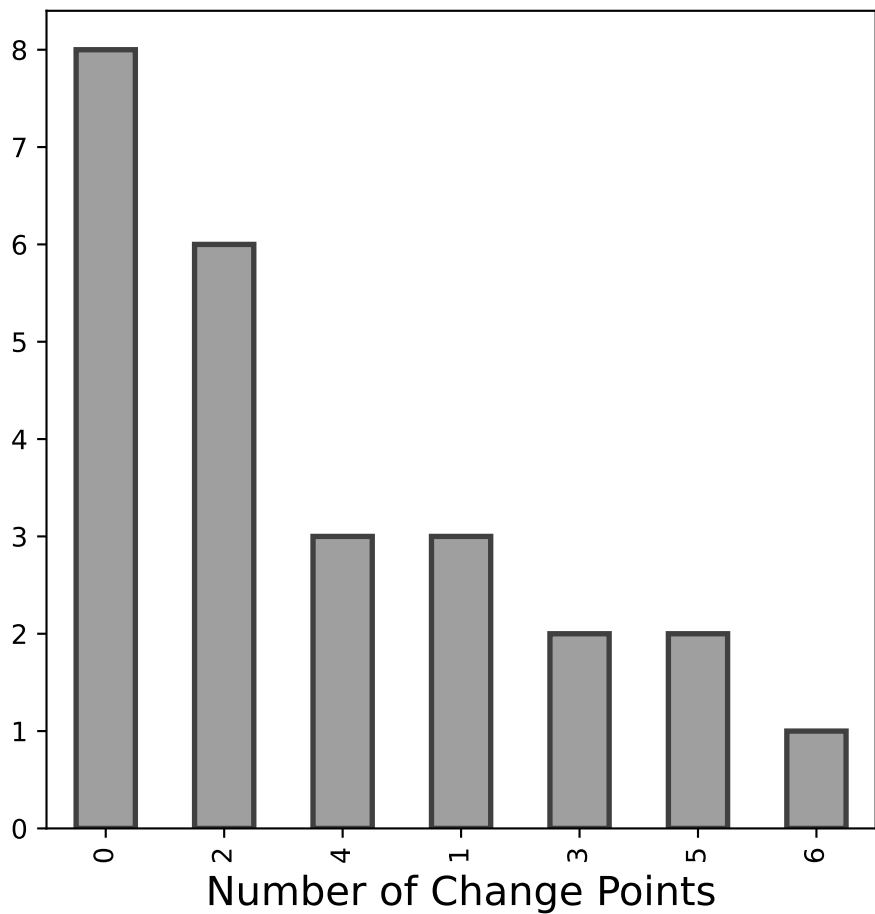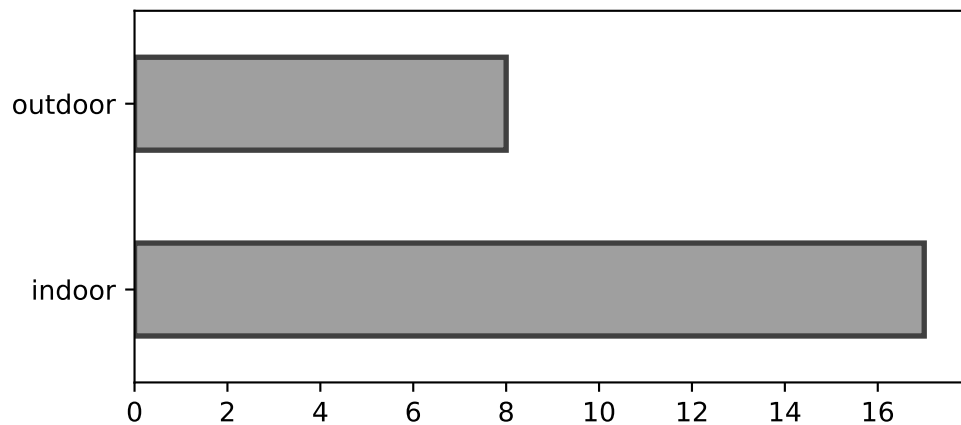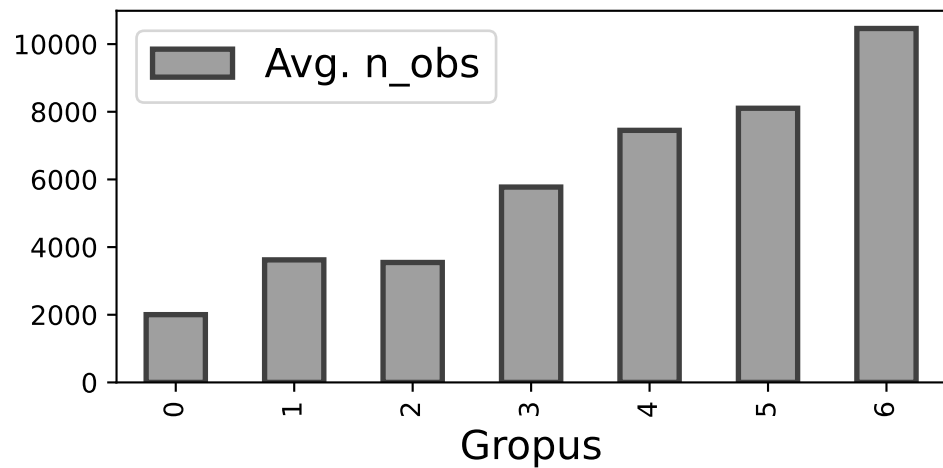

Supplement: supplementary_material [file HASC_appendix_analysis.pdf › CODE_SWCPD/Appendix/HASC_appendix_analysis.pdf]

Window Length

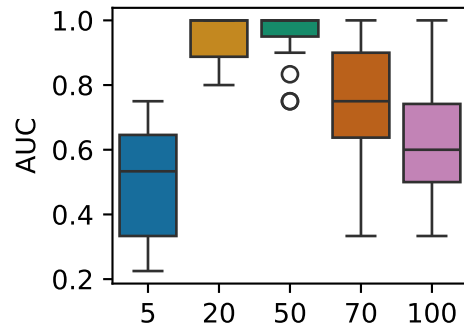

Lookback

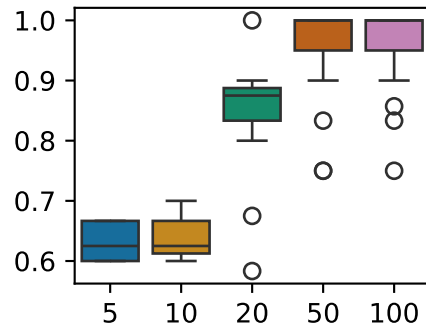

Monte Carlo Samples

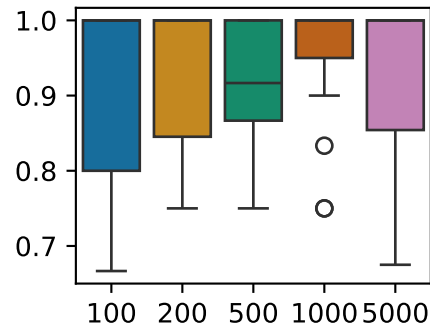

Wasserstein Order

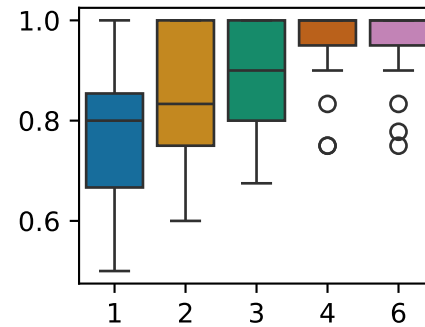

Sig Level

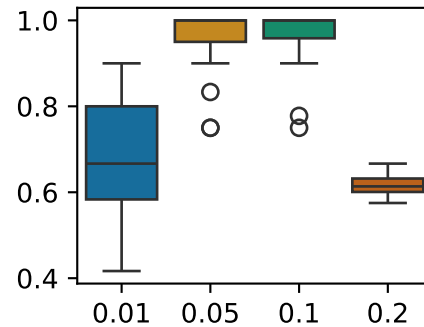

Covering Score

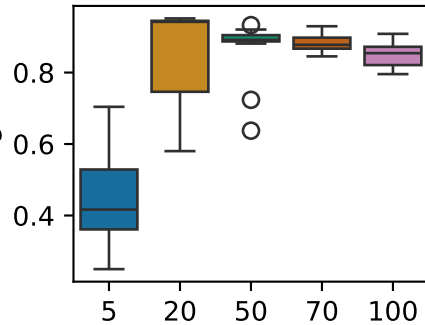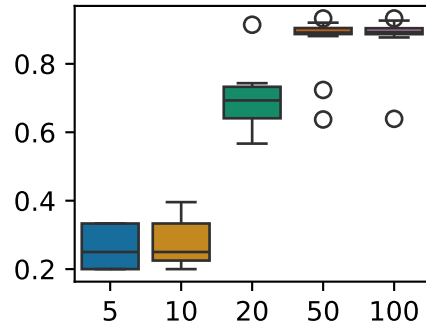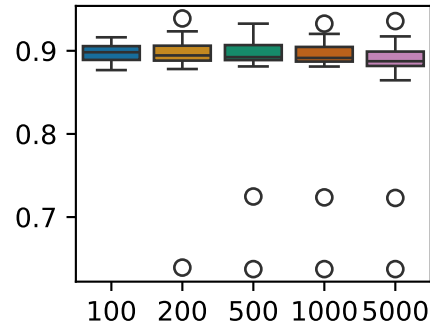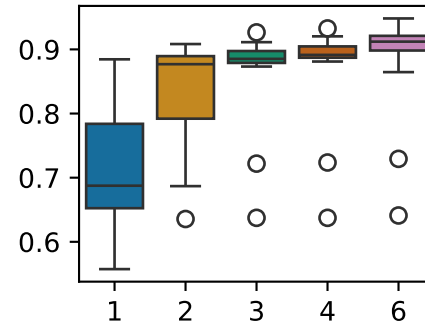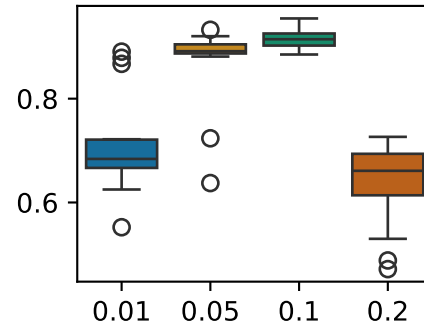

Supplement: supplementary_material [file AblationMNIST.pdf › CODE_SWCPD/ChangeDetection/AblationMNIST.pdf]

Sig Level

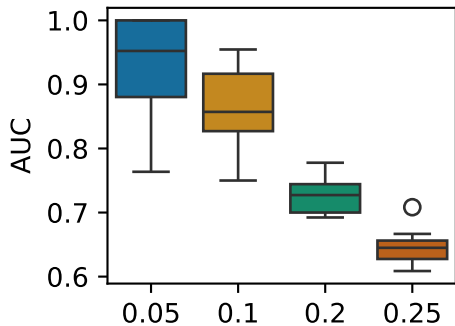

Wasserstein Order

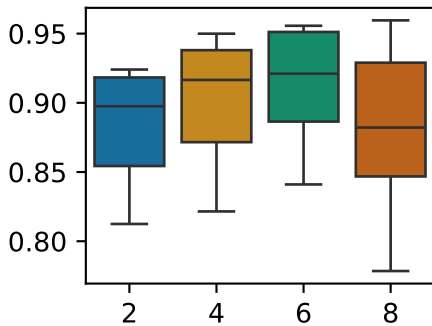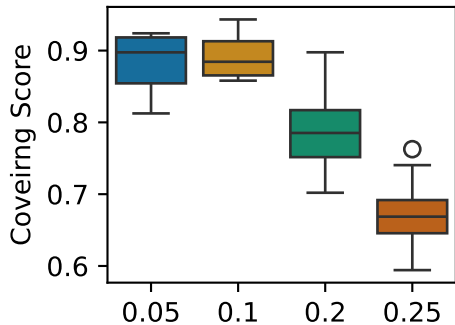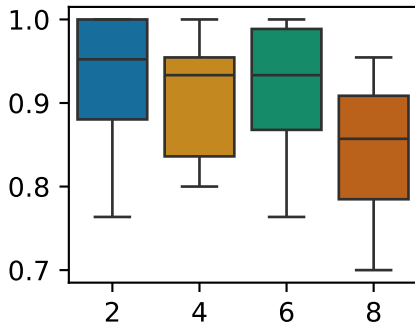

Supplement: supplementary_material [file AdditionalExpAppendix.pdf › CODE_SWCPD/ChangeDetection/AdditionalExpAppendix.pdf]

Time Series

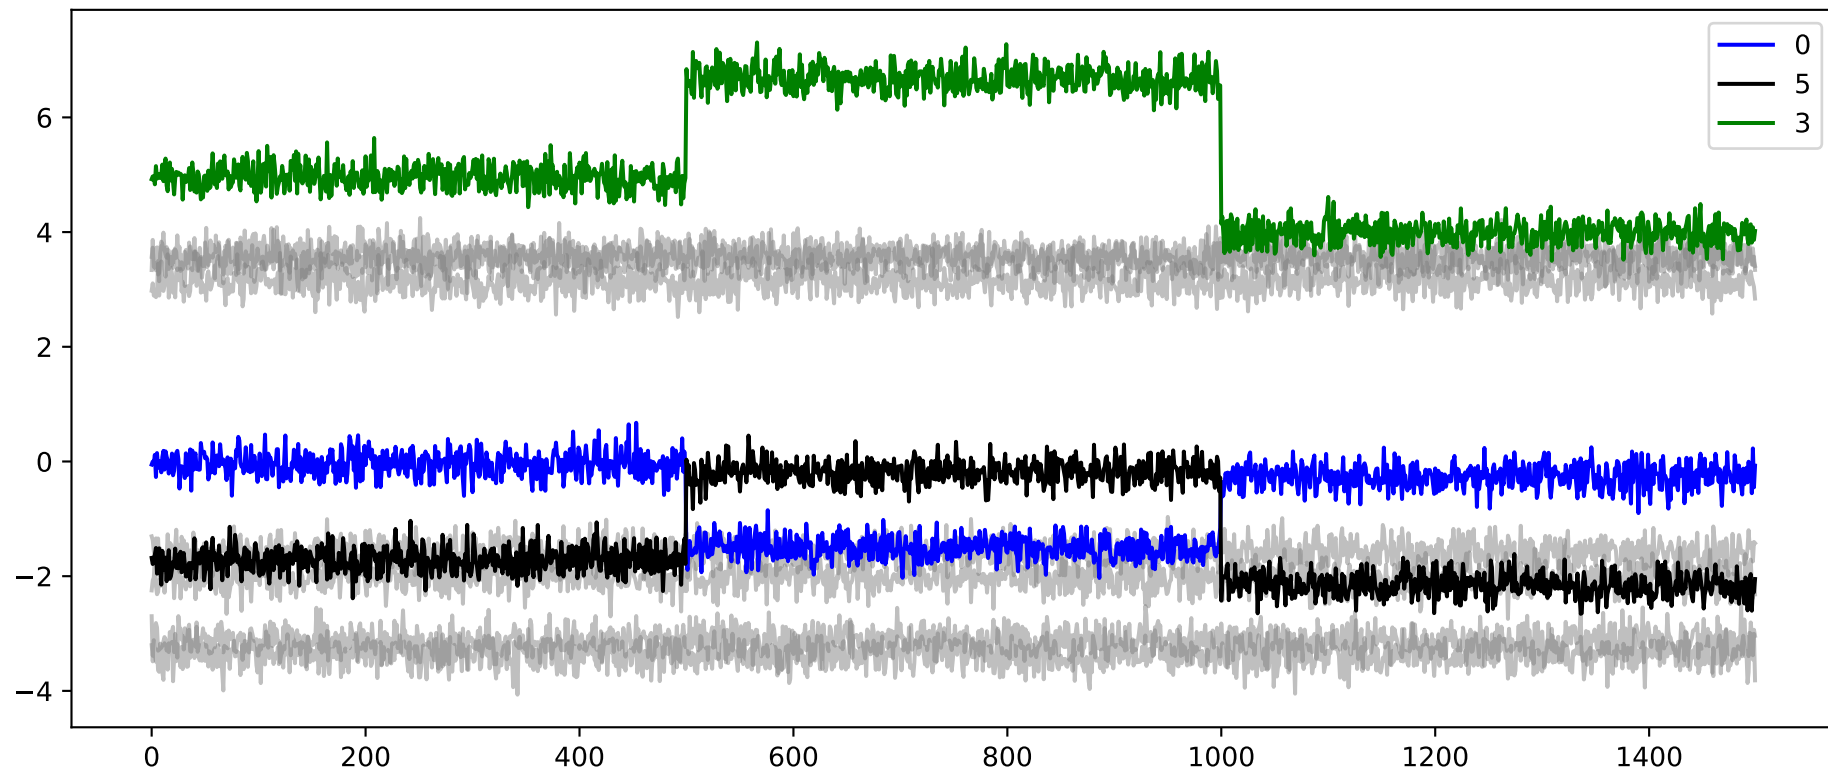

t=500

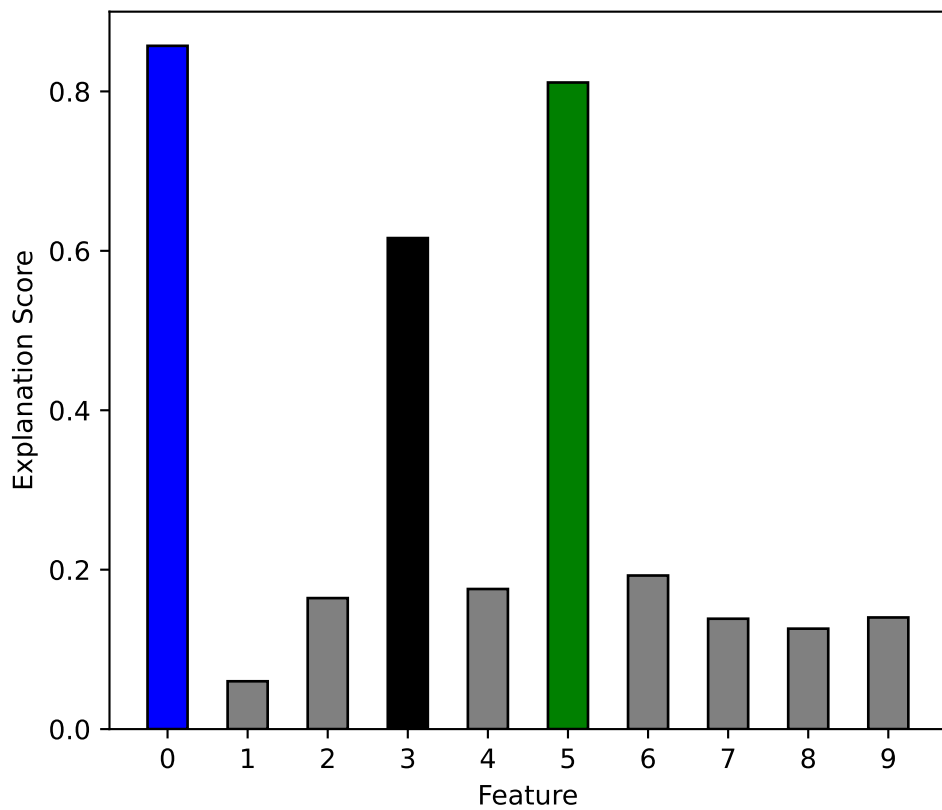

t=1000

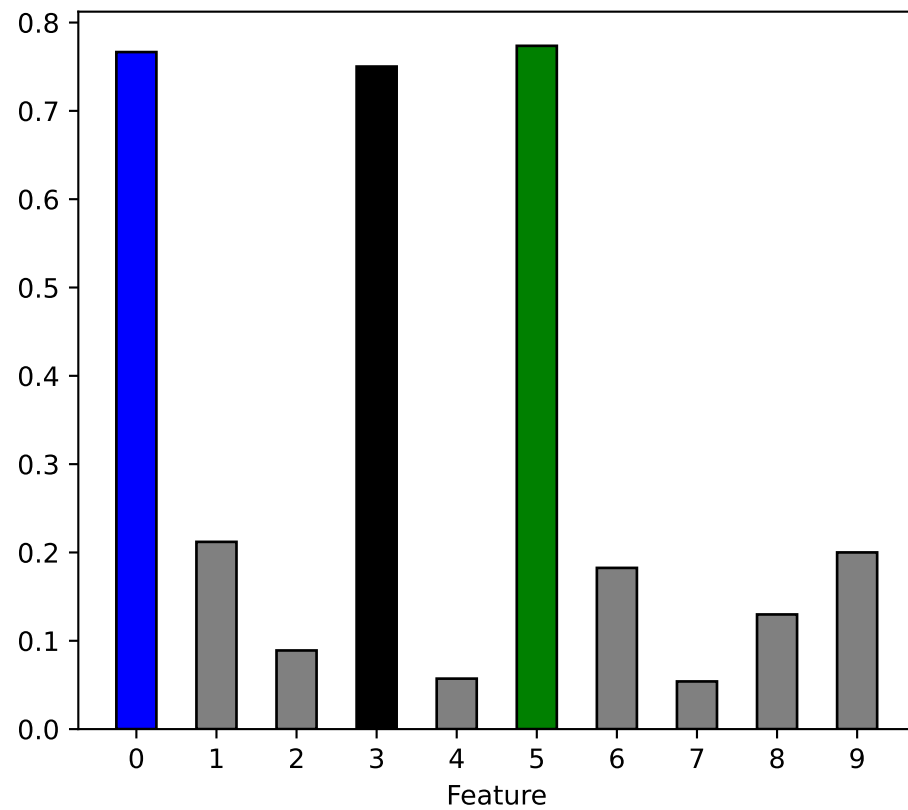

Supplement: supplementary_material [file Syn_explanation_plotCPD.pdf › CODE_SWCPD/ChangeDetection/Syn_explanation_plotCPD.pdf]

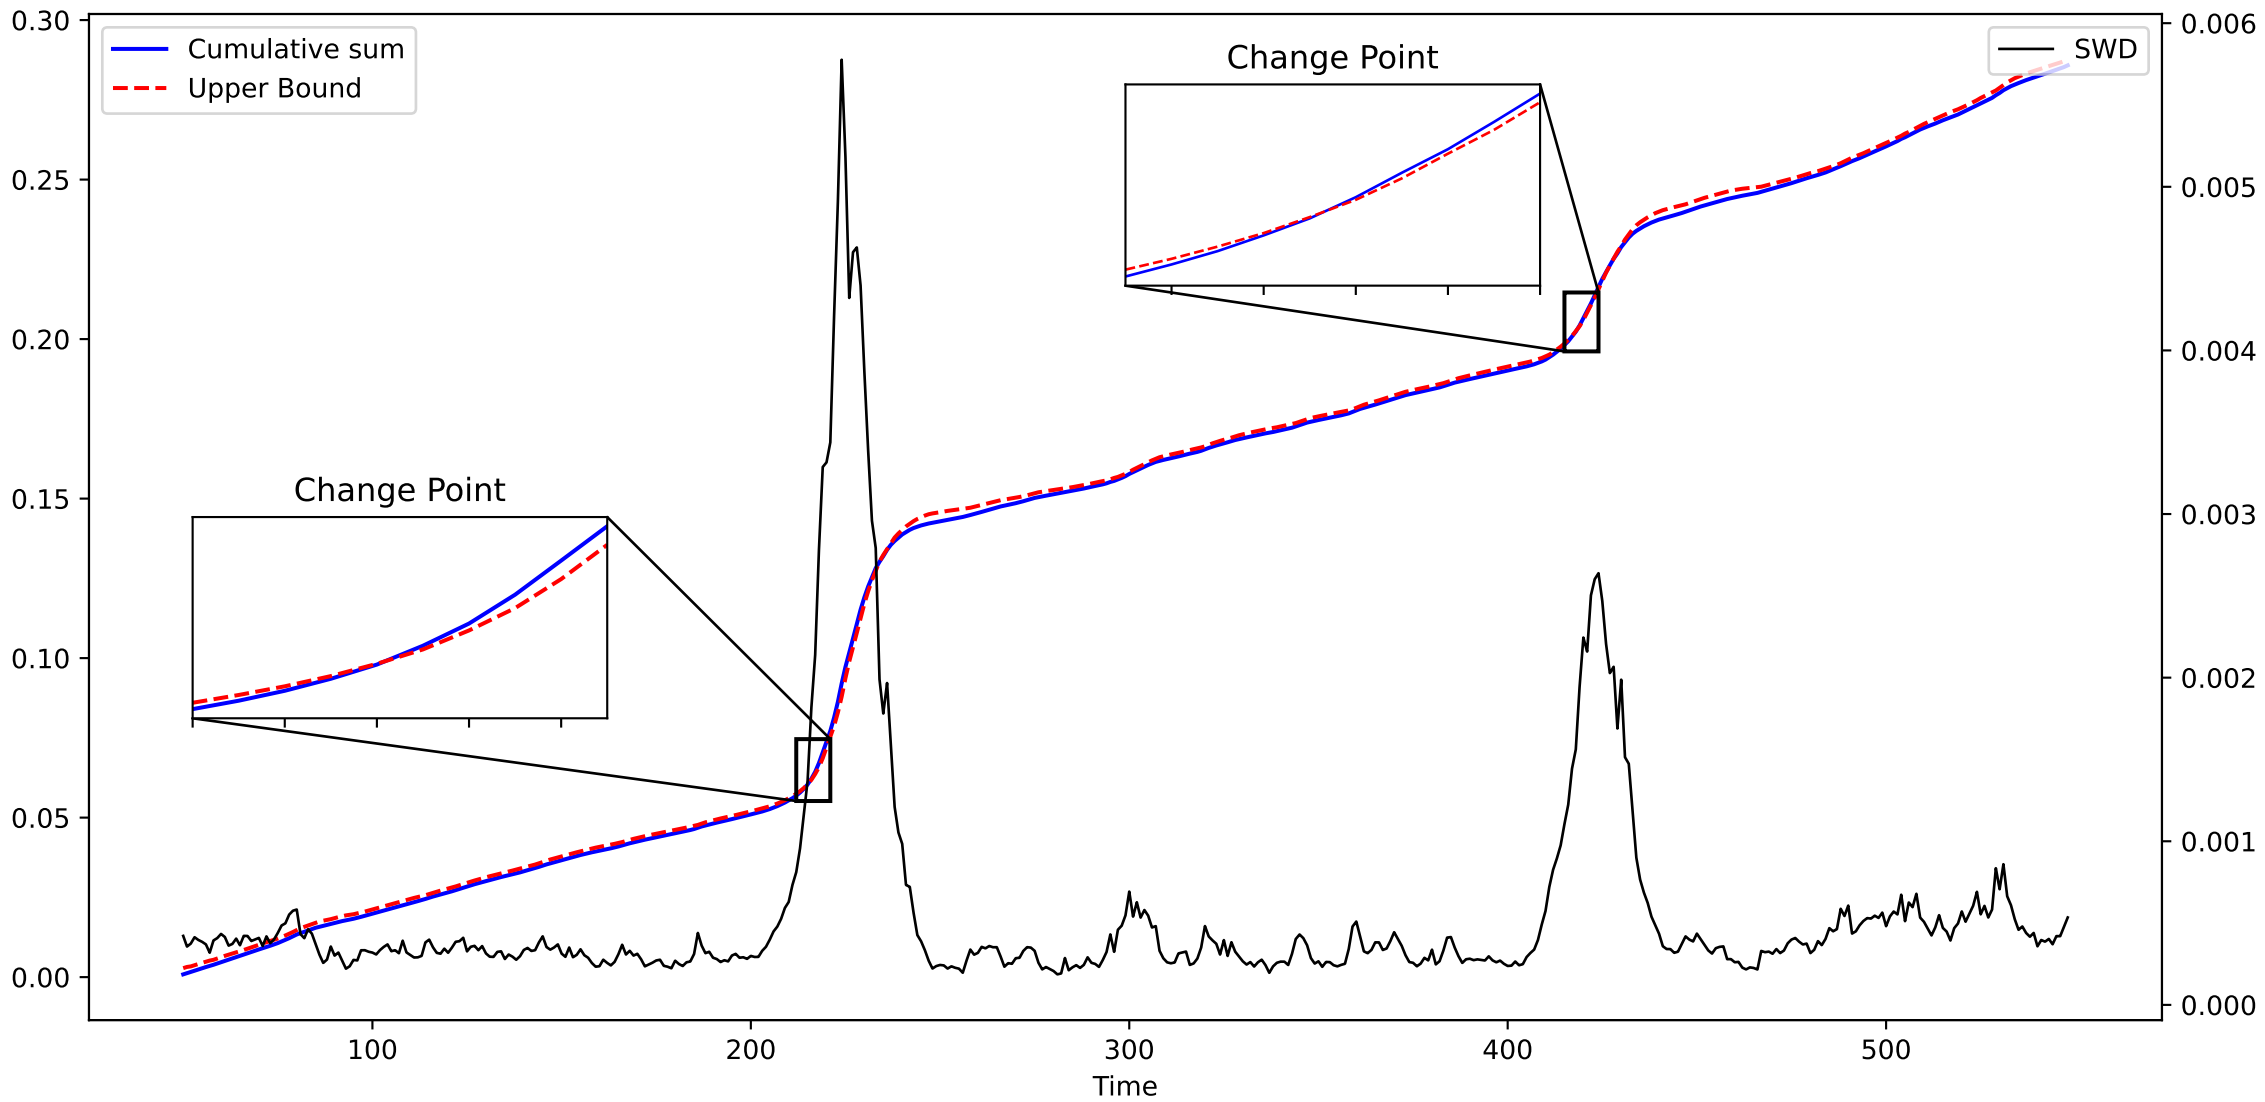

Supplement: supplementary_material [file UpperBoundZoom.pdf › CODE_SWCPD/ChangeDetection/UpperBoundZoom.pdf]

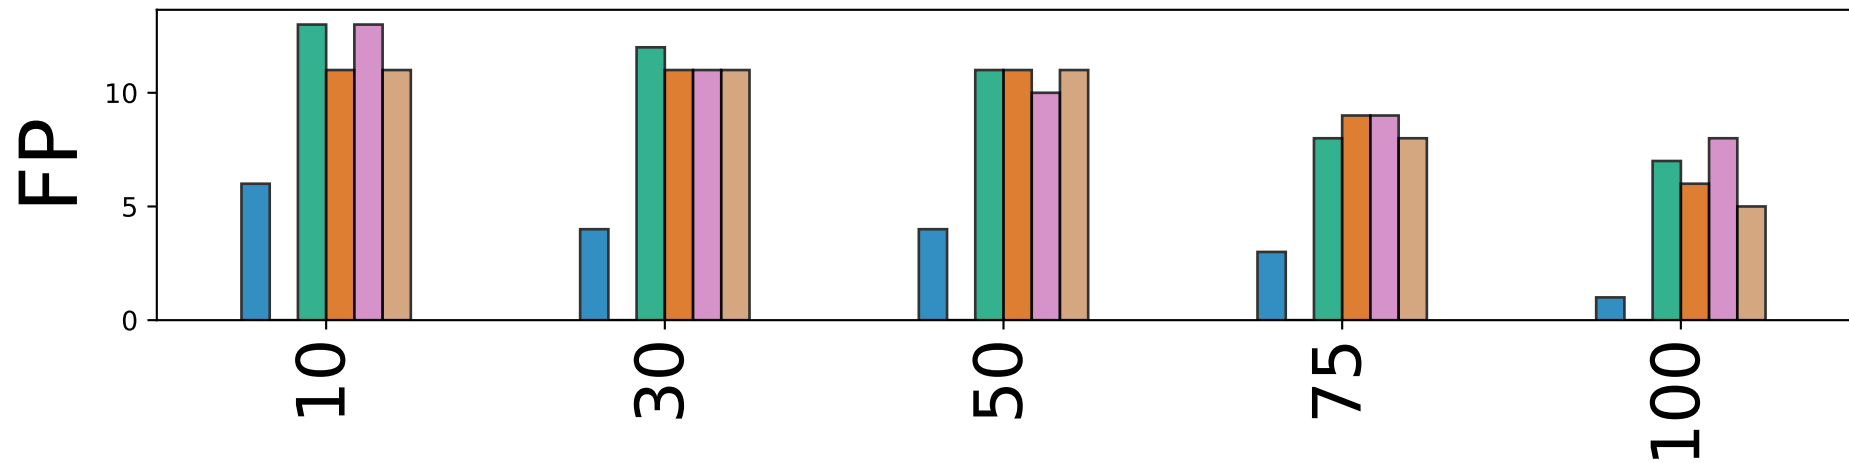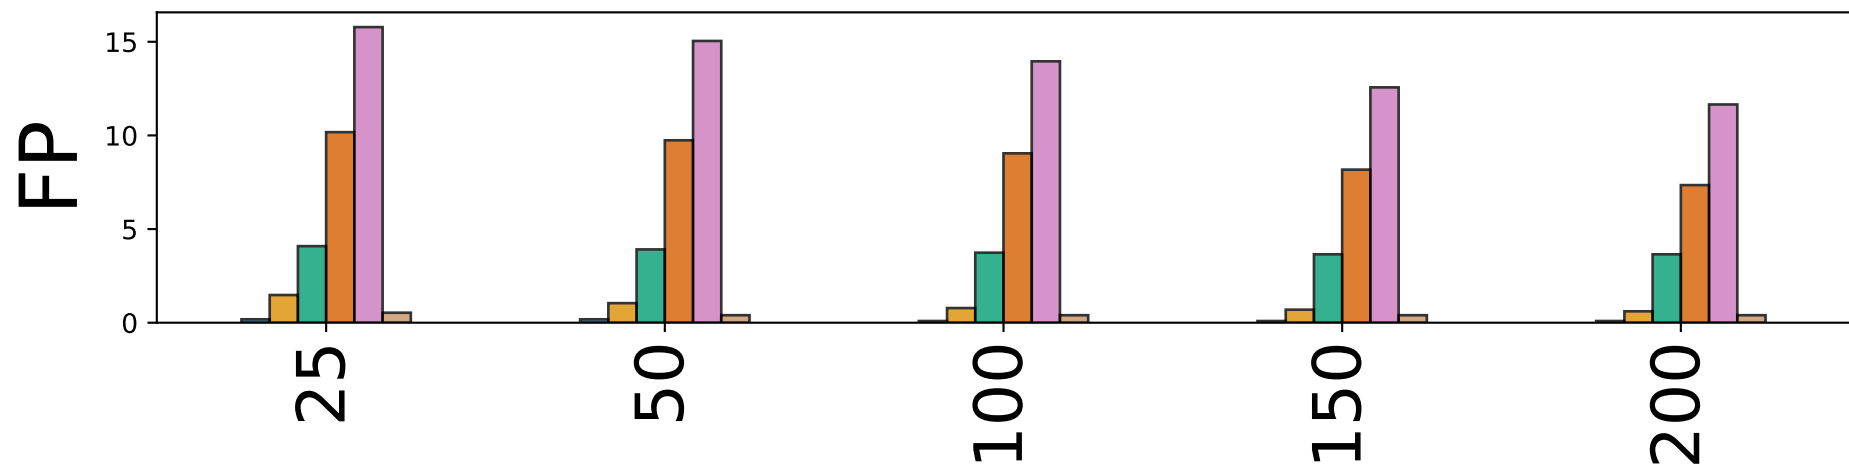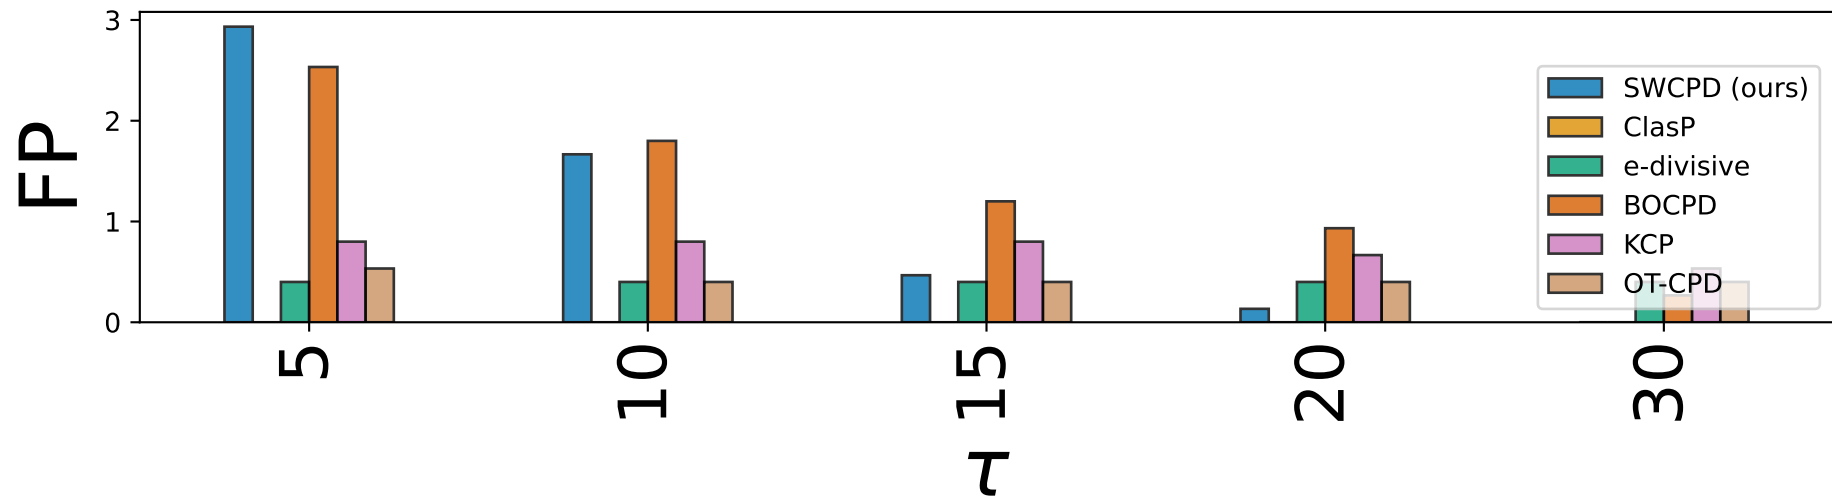

Supplement: supplementary_material [file newSensiplot_paper.pdf › CODE_SWCPD/ChangeDetection/newSensiplot_paper.pdf]
